# Supplementary material for: Photostability of thermally-hydrosilylated silicon quantum dots
Source: Royal Society of Chemistry journal article supplement (doi:10.1039/c5ra22827a), 2015-01-01
Supplement: c5ra22827a1.pdf [file c5ra22827a1.pdf]

# Supporting information for: Photostability of thermally-hydrosilylated silicon quantum dots

Jeslin J Wu\* and Uwe R Kortshagen\*

*Department of Mechanical Engineering, University of Minnesota, Minneapolis, MN, USA*

*55455*

E-mail: jeslinwu@umn.edu; kortshagen@umn.edu

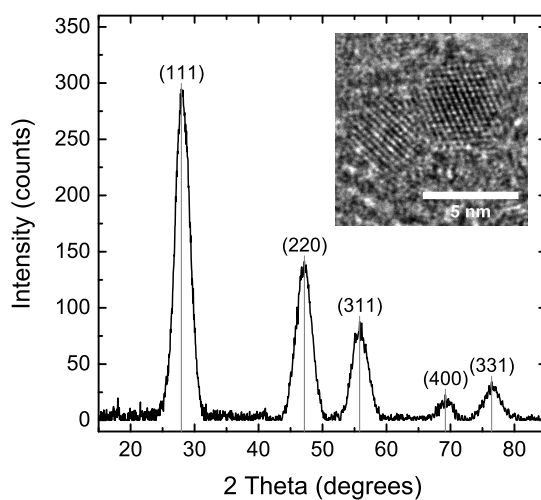

Figure S1: XRD pattern and TEM image (inset) of 4.2 nm SiNCs.

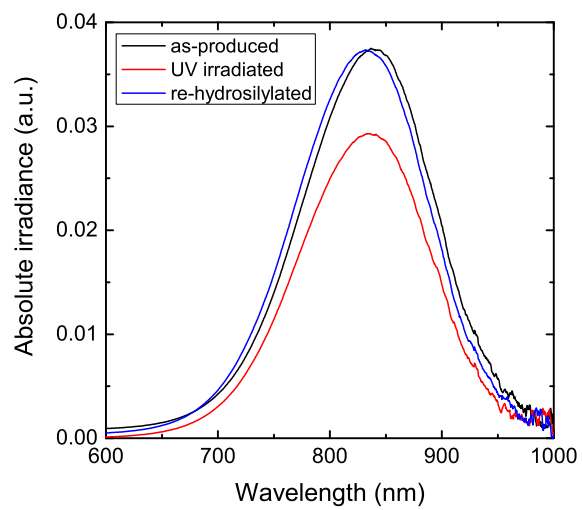

Figure S2: Emission spectra of the as-produced SiNCs (black), UV irradiated SiNCs (red), and re-hydrosilylated SiNCs (blue) normalized to their absorption intensities.

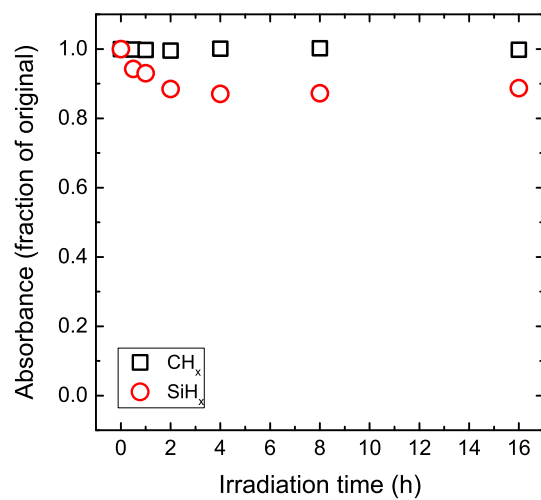

Figure S3: Time evolution of IR absorbance of CH<sub>x</sub> and SiH<sub>x</sub> groups during photobleaching on the ATR crystal.

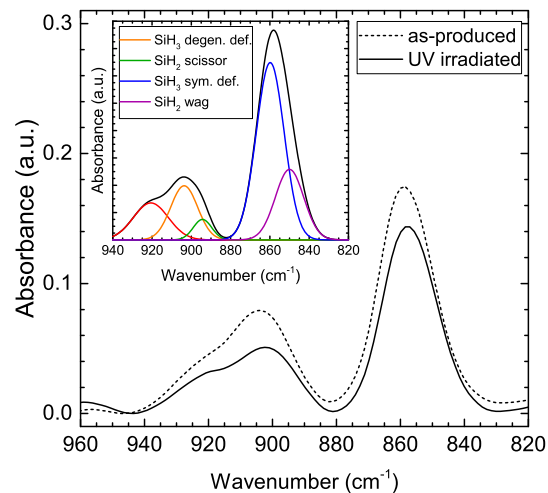

Figure S4: FT-IR spectra of the SiH<sub>x</sub> rotational modes of as-produced (dotted black) and UV irradiated (solid black) SiNCs. The inset displays the deconvoluted spectrum, showing SiH<sub>3</sub> degenerate deformation (orange), SiH<sub>2</sub> scissoring (green), SiH<sub>3</sub> symmetrical deformation (blue), and SiH<sub>2</sub> wagging (purple) modes.

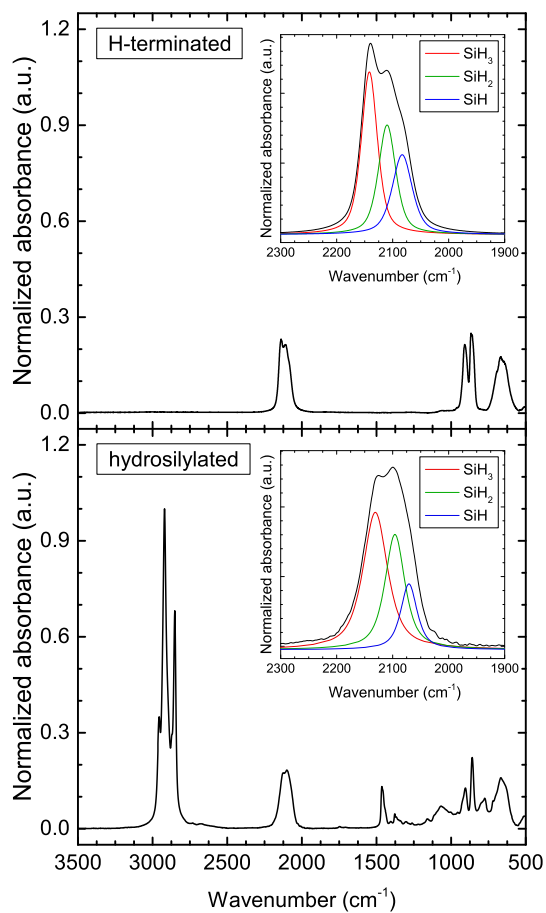

Figure S5: Typical FT-IR spectra of H-terminated SiNCs (top) and thermally-hydrosilylated SiNCs (bottom). Insets show deconvoluted spectra of the silicon hydride stretching modes: SiH<sub>3</sub> (red), SiH<sub>2</sub> (green) and SiH (blue).

Figure S6: Deconvolution of SiH<sub>x</sub> stretching modes

Origin (OriginLab, Northampton, MA) was used to deconvolute the SiH, SiH<sub>2</sub>, and SiH<sub>3</sub> stretching modes. The three peaks were fitted using the Pseudo-Voigt function with a combination of 60 % Gaussian and 40 % Lorentzian functions.

The peak centers of the SiH, SiH<sub>2</sub>, and SiH<sub>3</sub> modes were fixed at 2130 cm<sup>-1</sup>, 2096 cm<sup>-1</sup>, and 2070 cm<sup>-1</sup>, respectively, and the peak widths were allowed to deviate from 30 cm<sup>-1</sup> to 50 cm<sup>-1</sup>. The width of the SiH mode was determined to be 39 cm<sup>-1</sup>, the width of the SiH<sub>2</sub> mode was 40 cm<sup>-1</sup>, and the width of the SiH<sub>3</sub> mode was 47 cm<sup>-1</sup>. The amplitude of the fitted profiles of the SiNCs were determined via the Origin peak fitting tool. The coefficients of determination, R<sub>2</sub>, were used to determine quality of fits; all fits possessed R<sub>2</sub> values above 0.99.

To compare the as-produced to the irradiated SiNCs, the CH<sub>x</sub> peaks of the two samples were used as references (the organic ligands are stable against UV irradiation as determined from in-situ FT-IR spectroscopy). The peak areas of the SiH<sub>x</sub> modes were normalized to the integrated areas of their respective CH<sub>x</sub> modes. The absorbance of the SiH, SiH<sub>2</sub>, and SiH<sub>3</sub> modes were then normalized to the total SiH<sub>x</sub> absorbance of the as-produced SiNCs.
